# Supplementary material for: Explosive molecule sensing at lattice defect sites in metallic carbon nanotubes
Source: Royal Society of Chemistry journal article supplement (doi:10.1039/d1ma00571e), 2021-01-01
Supplement: d1ma00571e1.pdf [file d1ma00571e1.pdf]

## SUPPORTING INFORMATION

# Explosive Molecule Sensing at Lattice Defect Sites in Metallic Carbon Nanotubes

Manasi Doshi and Eric P. Fahrenthold\*

*Department of Mechanical Engineering, University of Texas, Austin, TX 78712*

\* E-mail: [epfahren@mail.utexas.edu](mailto:epfahren@mail.utexas.edu)

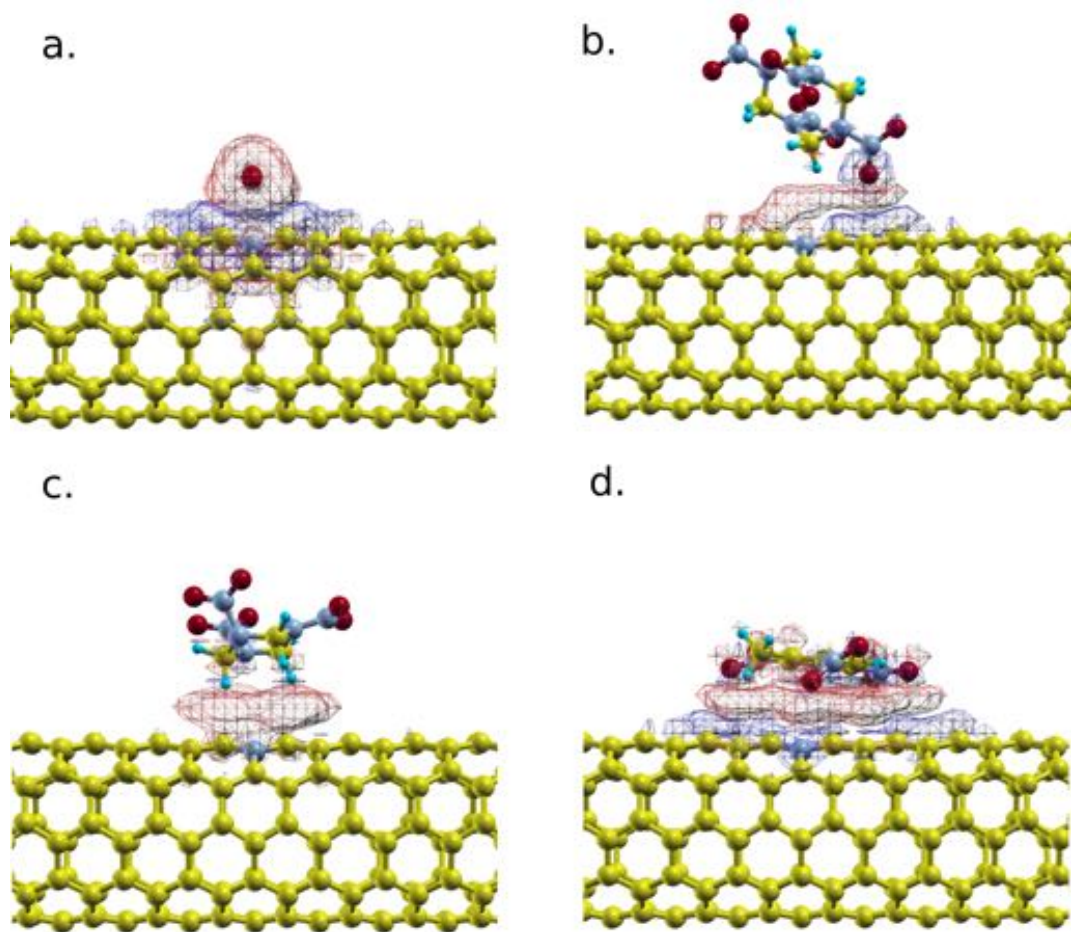

Figure S1: Charge density difference plots for sensing by a nitrogen-doped CNT(5,5): (a) O<sub>2</sub> sensing, (b) HMX sensing, (c) RDX sensing, and (d) TNT sensing

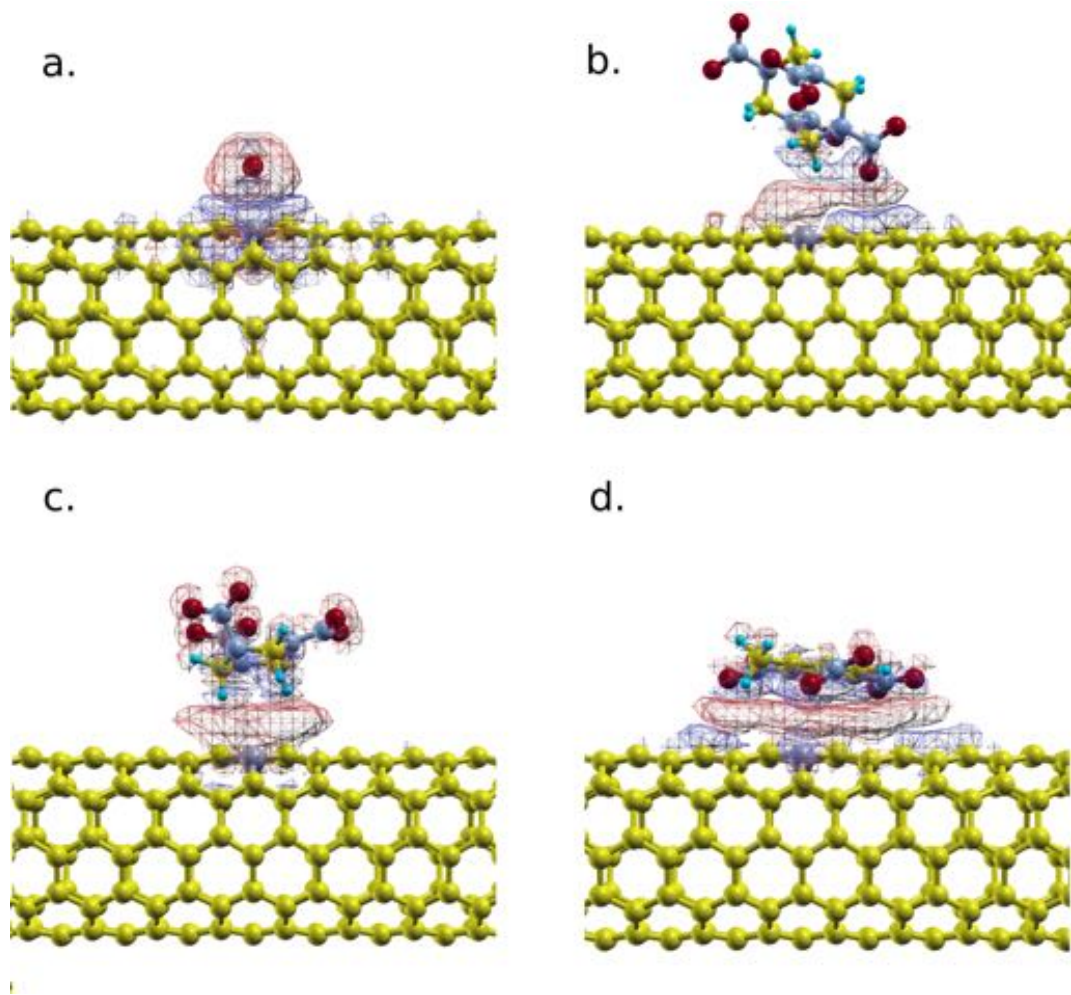

Figure S2: Charge density difference plots for sensing by a boron-doped CNT(5,5): (a) O<sub>2</sub> sensing, (b) HMX sensing, (c) RDX sensing, and (d) TNT sensing

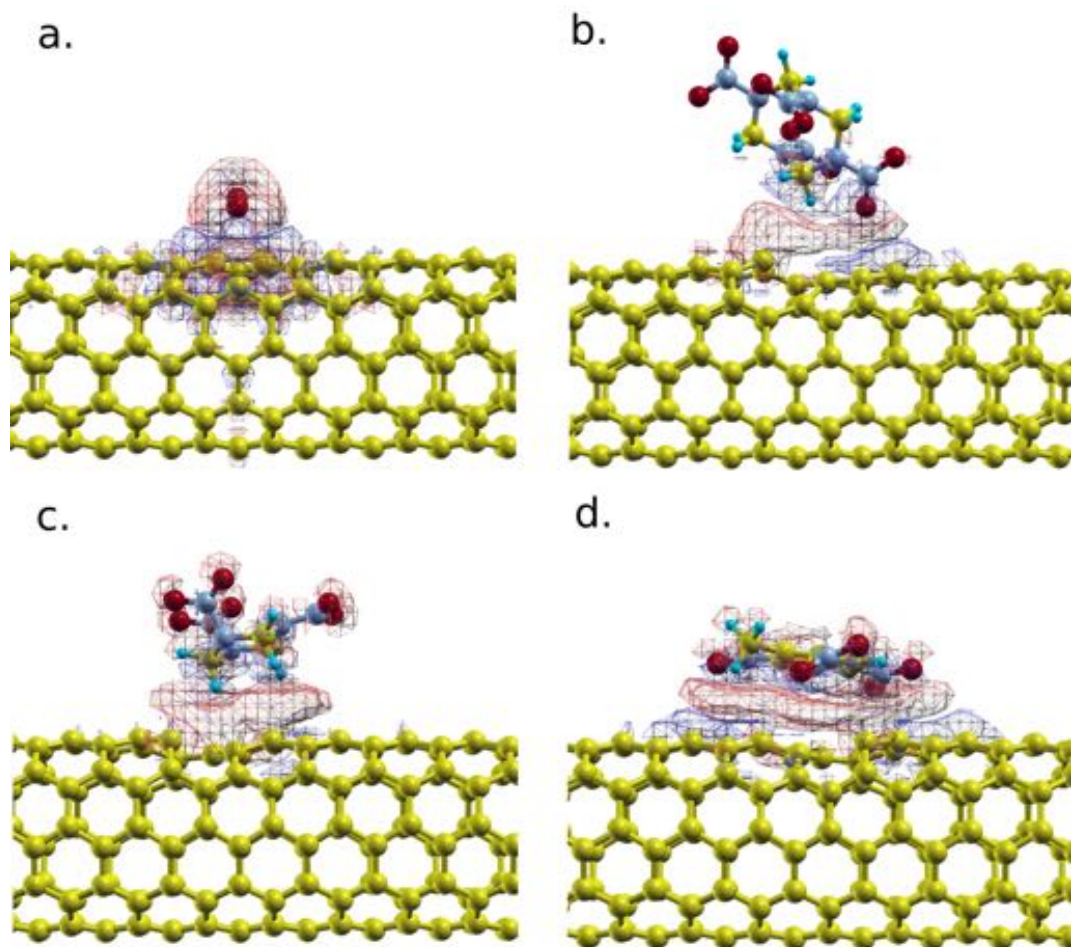

Figure S3: Charge density difference plots for sensing by a CNT(5,5) with a vacancy defect: (a) O<sub>2</sub> sensing, (b) HMX sensing, (c) RDX sensing, and (d) TNT sensing

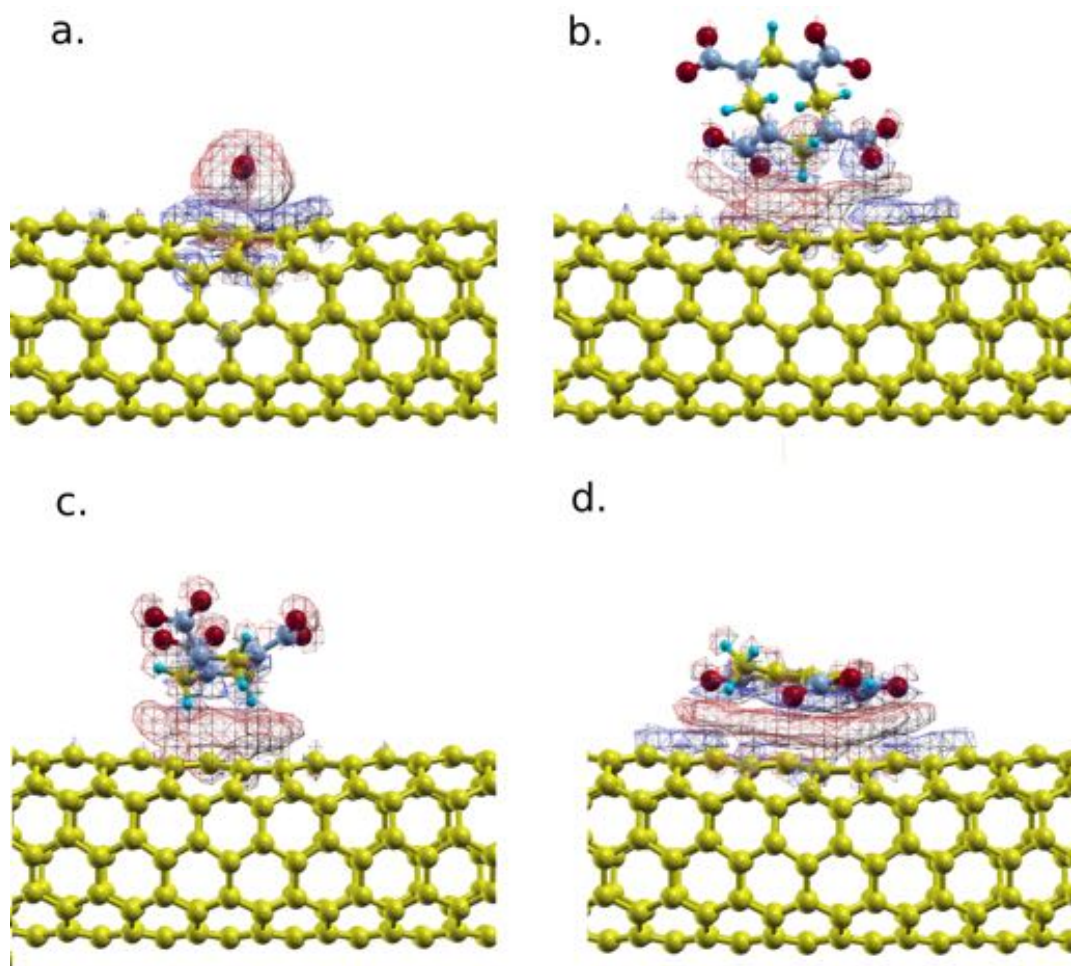

Figure S4: Charge density difference plots for sensing by a CNT(5,5) with a divacancy defect: (a) O<sub>2</sub> sensing, (b) HMX sensing, (c) RDX sensing, and (d) TNT sensing



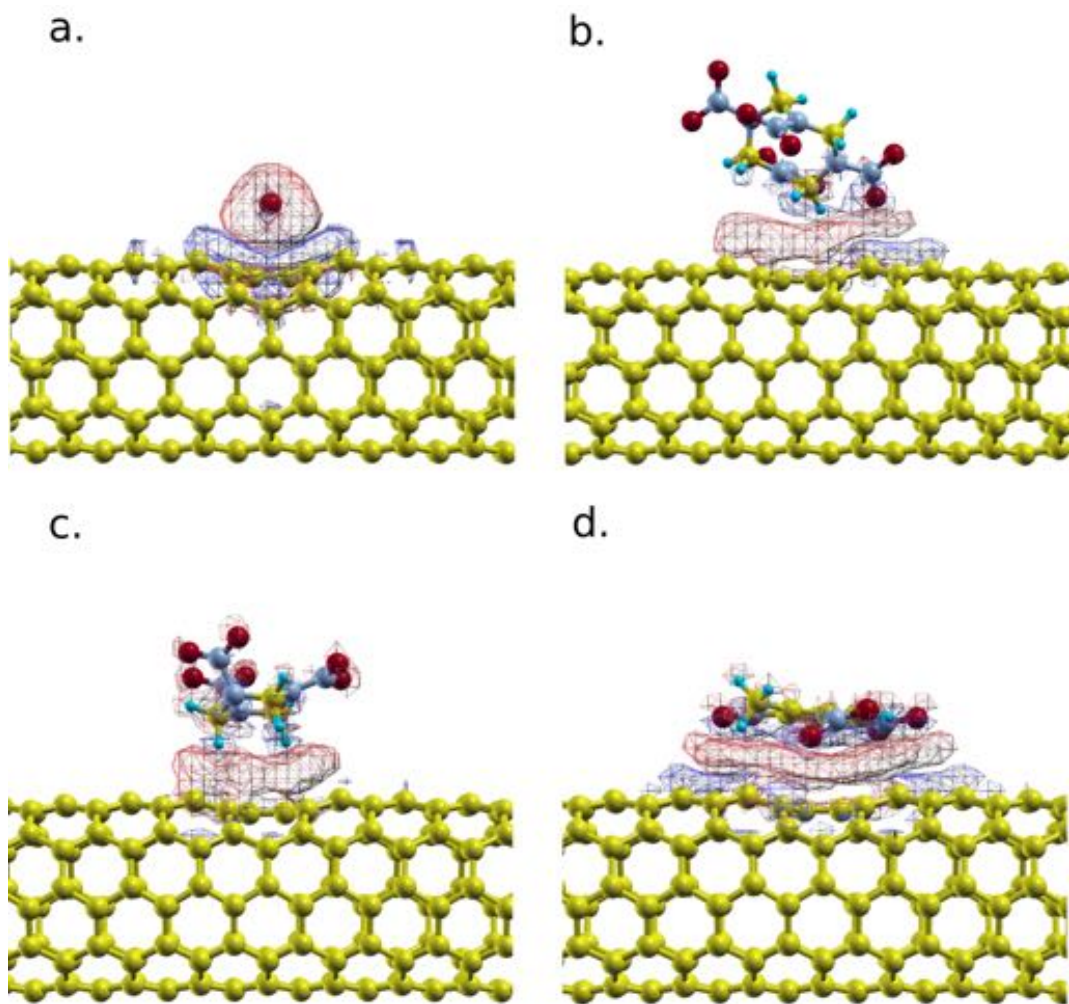

Figure S5: Charge density difference plots for sensing by a CNT(5,5) with a Stone-Wales defect: (a) O<sub>2</sub> sensing, (b) HMX sensing, (c) RDX sensing, and (d) TNT sensing
